# Supplementary material for: Competition between C–H⋯S and S–H⋯Cl H-bonds in a CHCl3–H2S complex: a combined matrix isolation IR spectroscopic and quantum chemical investigation
Source: Royal Society of Chemistry journal article supplement (doi:10.1039/d4cp03509g), 2024-12-02
Supplement: d4cp03509g1.pdf [file d4cp03509g1.pdf]

**Electronic Supporting Information**

**for**

**Competition between C–H···S and S–H···Cl H-bonds in CHCl<sub>3</sub>-H<sub>2</sub>S complex: A  
combined matrix isolation IR spectroscopic and quantum chemical investigation**

Binod Kumar Oram, Monu, Ankita Kothari, Biman Bandyopadhyay\*

Department of Chemistry, Malaviya National Institute of Technology Jaipur, J L N Marg,

Jaipur – 302017, India

E-mail: [biman.chy@mnit.ac.in](mailto:biman.chy@mnit.ac.in)

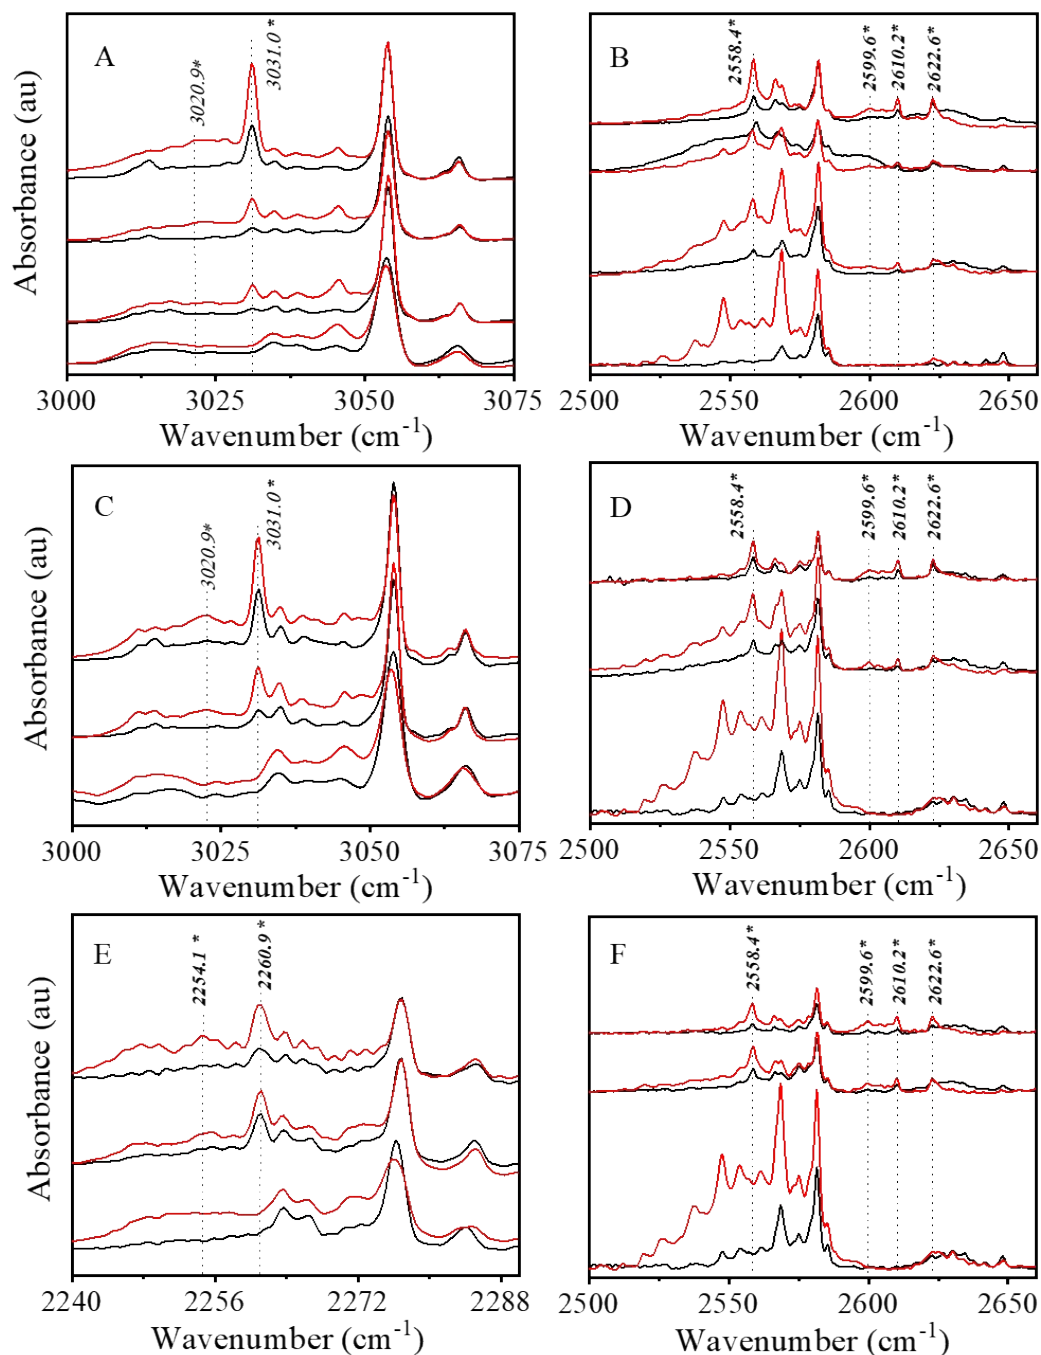

**Figure S1:** Changes in  $\nu_{C-H}$  region of  $\text{CHCl}_3$  (A and C) and  $\nu_{C-D}$  region of  $\text{CDCl}_3$  (E) upon addition of  $\text{H}_2\text{S}$  at  $\text{CHCl}_3:\text{H}_2\text{S}:\text{Ar}$  mixing ratios of 5:5:5000; 5:2:5000, 5:1:5000, and 5:0:5000 from top to bottom (A) and  $\text{CHCl}_3(\text{CDCl}_3):\text{H}_2\text{S}:\text{Ar}$  mixing ratios of 2:2:5000, 2:1:5000, and 2:0:5000 from top to bottom (C and E). Changes in  $\nu_{S-H}$  region of  $\text{H}_2\text{S}$  upon addition of  $\text{CHCl}_3$  (B and D) and  $\text{CDCl}_3$  (F) at  $\text{CHCl}_3:\text{H}_2\text{S}:\text{Ar}$  mixing ratios of 5:5:5000; 2:5:5000, and 1:5:5000, and 0:5:5000 from top to bottom (B) and  $\text{CHCl}_3(\text{CDCl}_3):\text{H}_2\text{S}:\text{Ar}$  mixing ratios of 2:2:5000, 1:2:5000, and 0:2:5000 from top to bottom (D and F)

Bar diagrams of the spectral band intensities (absorbance of spectral bands in the experimental spectra) of the newly appearing bands due to formation of  $\text{CHCl}_3\text{-H}_2\text{S}$  complexes have been plotted against their wavenumbers to quantitatively estimate the variation in population of different complexes with change in  $\text{CHCl}_3(\text{CDCl}_3)\text{:H}_2\text{S:Ar}$  mixing ratios as well as due to annealing of deposited matrix. As FWHM of the bands are nearly constant at various mixing proportion, the peak height gives idea about the population variation. The band intensity in the pre-annealed spectrum has been shown in solid colour lines, whereas that in the annealed spectrum have been shown with dashed colour lines.

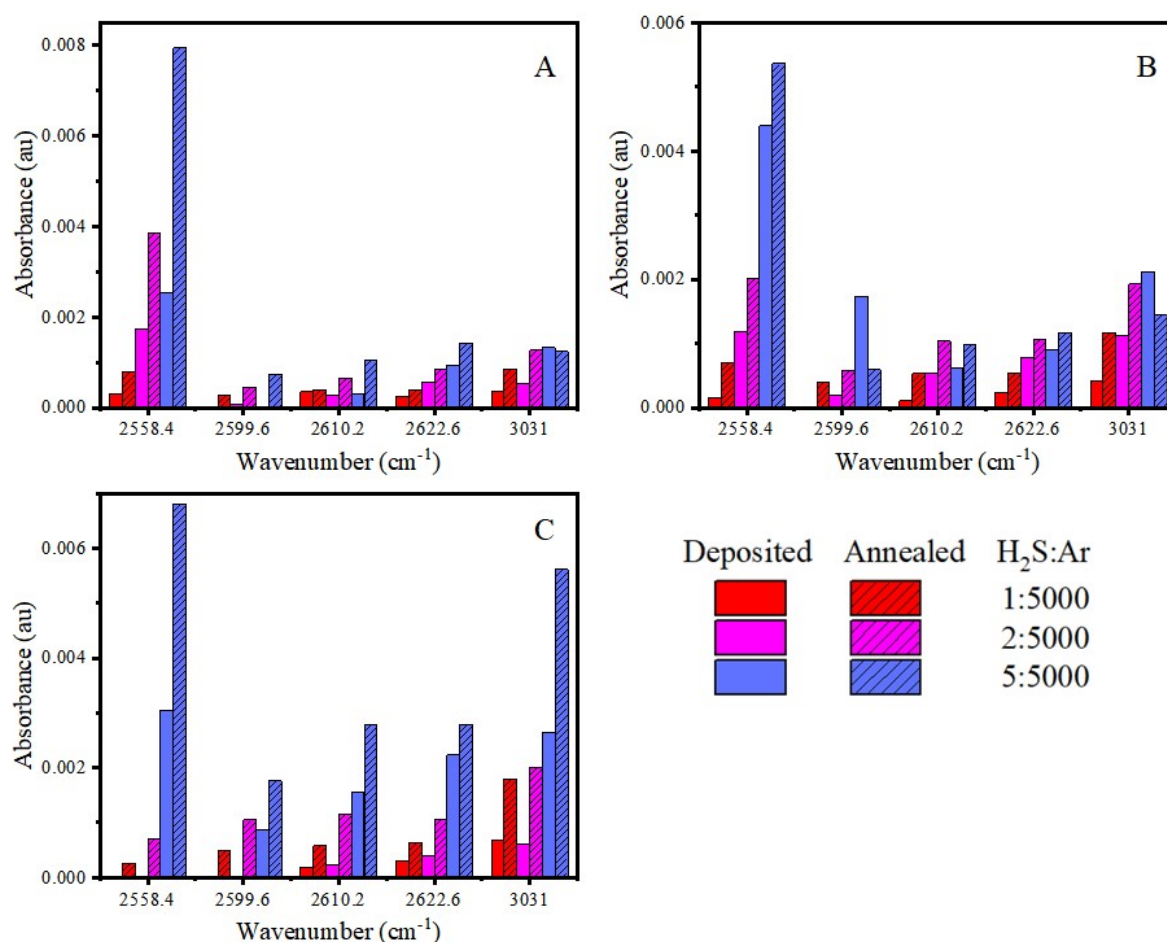

**Figure S2:** Variation in intensities of  $\nu_{C-H}$  (divided by 5) and  $\nu_{S-H}$  band with varying  $\text{H}_2\text{S}$  concentration.  $\text{CHCl}_3\text{:Ar}$  mixing ratio is 1:5000 (A) 1:2000 (B) 1:1000 (C)

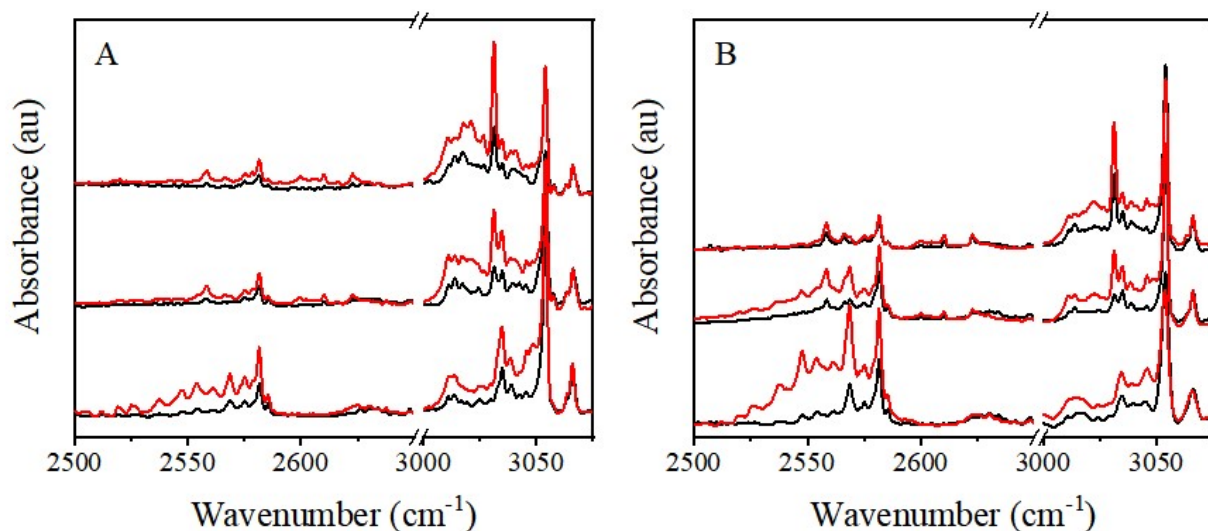

**Figure S3:**  $\text{CHCl}_3:\text{H}_2\text{S}:\text{Ar}$  (in  $\nu_{\text{C-H}}$  region), and  $\text{H}_2\text{S}:\text{CHCl}_3:\text{Ar}$  (in  $\nu_{\text{S-H}}$  region) in the mixing proportion of 1:2:5000; 1:1:5000, and 1:0:5000 (A); 2:2:5000; 2:1:5000, and 2:0:5000 (B) from top to bottom

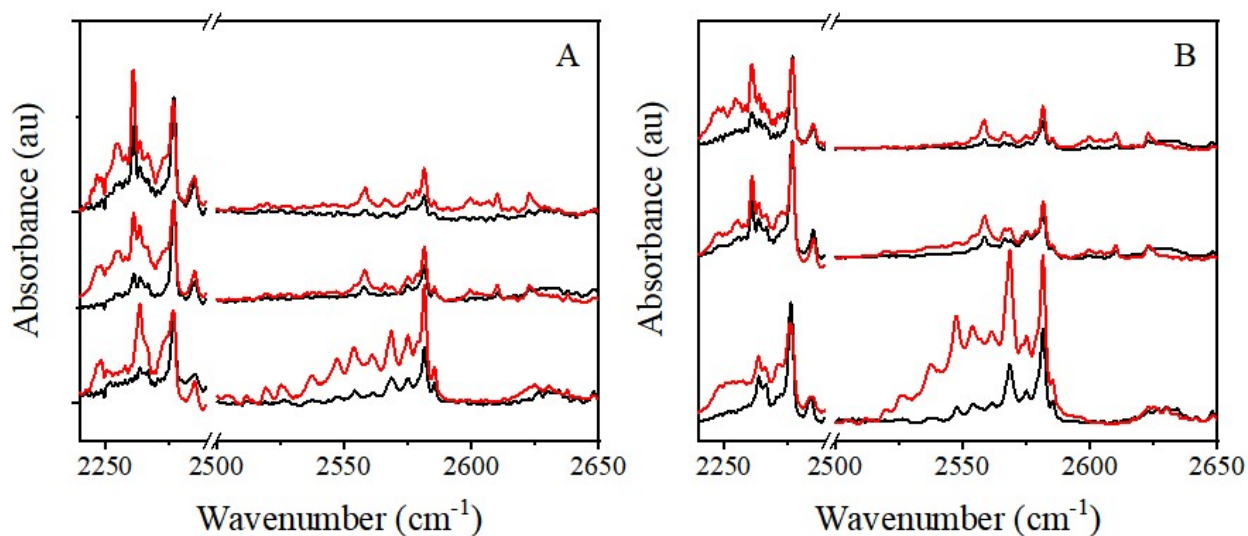

**Figure S4:**  $\text{CDCl}_3:\text{H}_2\text{S}:\text{Ar}$  (in  $\nu_{\text{C-D}}$  region), and  $\text{H}_2\text{S}:\text{CDCl}_3:\text{Ar}$  (in  $\nu_{\text{S-H}}$  region) in the mixing proportion of 1:2:5000; 1:1:5000, and 1:0:5000 (A); 2:2:5000; 2:1:5000, and 2:0:5000 (B) from top to bottom

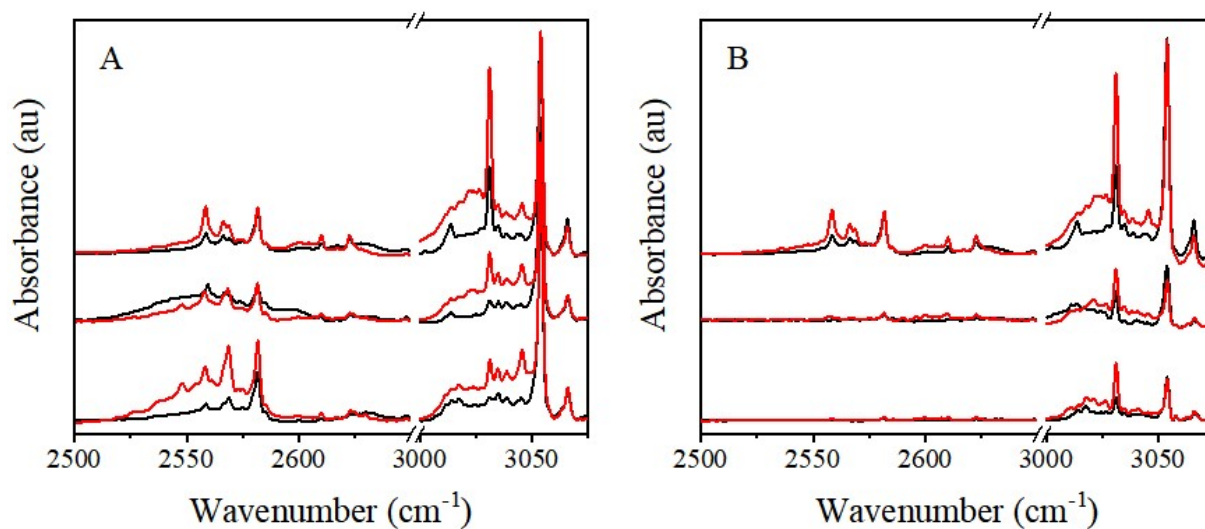

**Figure S5:**  $\text{CHCl}_3:\text{H}_2\text{S}:\text{Ar}$  (in  $\nu_{C-H}$  region), and  $\text{H}_2\text{S}:\text{CHCl}_3:\text{Ar}$  (in  $\nu_{S-H}$  region) in the mixing proportion of 5:5:5000; 5:2:5000, and 5:1:5000 (A) 5:5:5000; 2:5:5000, and 1:5:5000 (B) from top to bottom

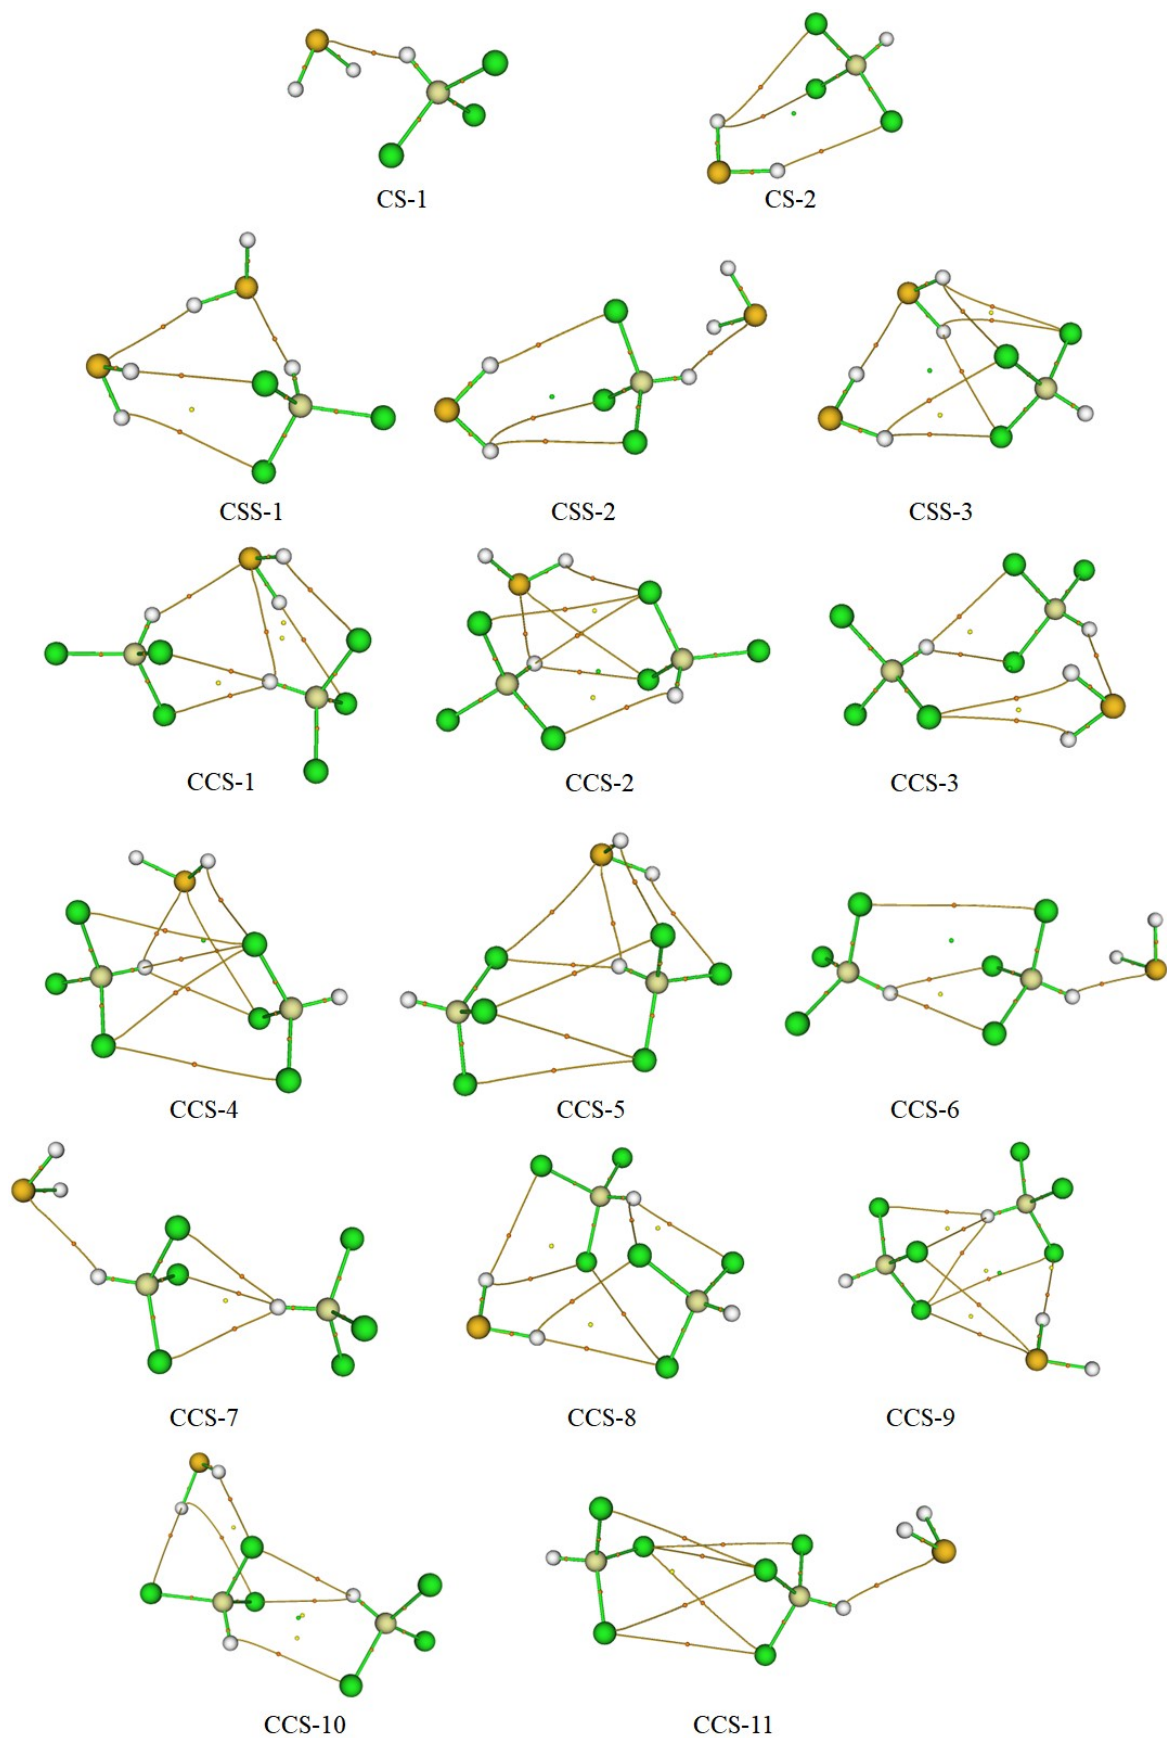

**Figure S6:** Bond critical points for all the conformers of  $(\text{CHCl}_3)_X\text{-(H}_2\text{S)}_Y$  ( $X, Y=1, 2$ ) complex, calculated at  $\omega\text{B97X-D/aug-cc-pV(D+d)Z}$  level of theory

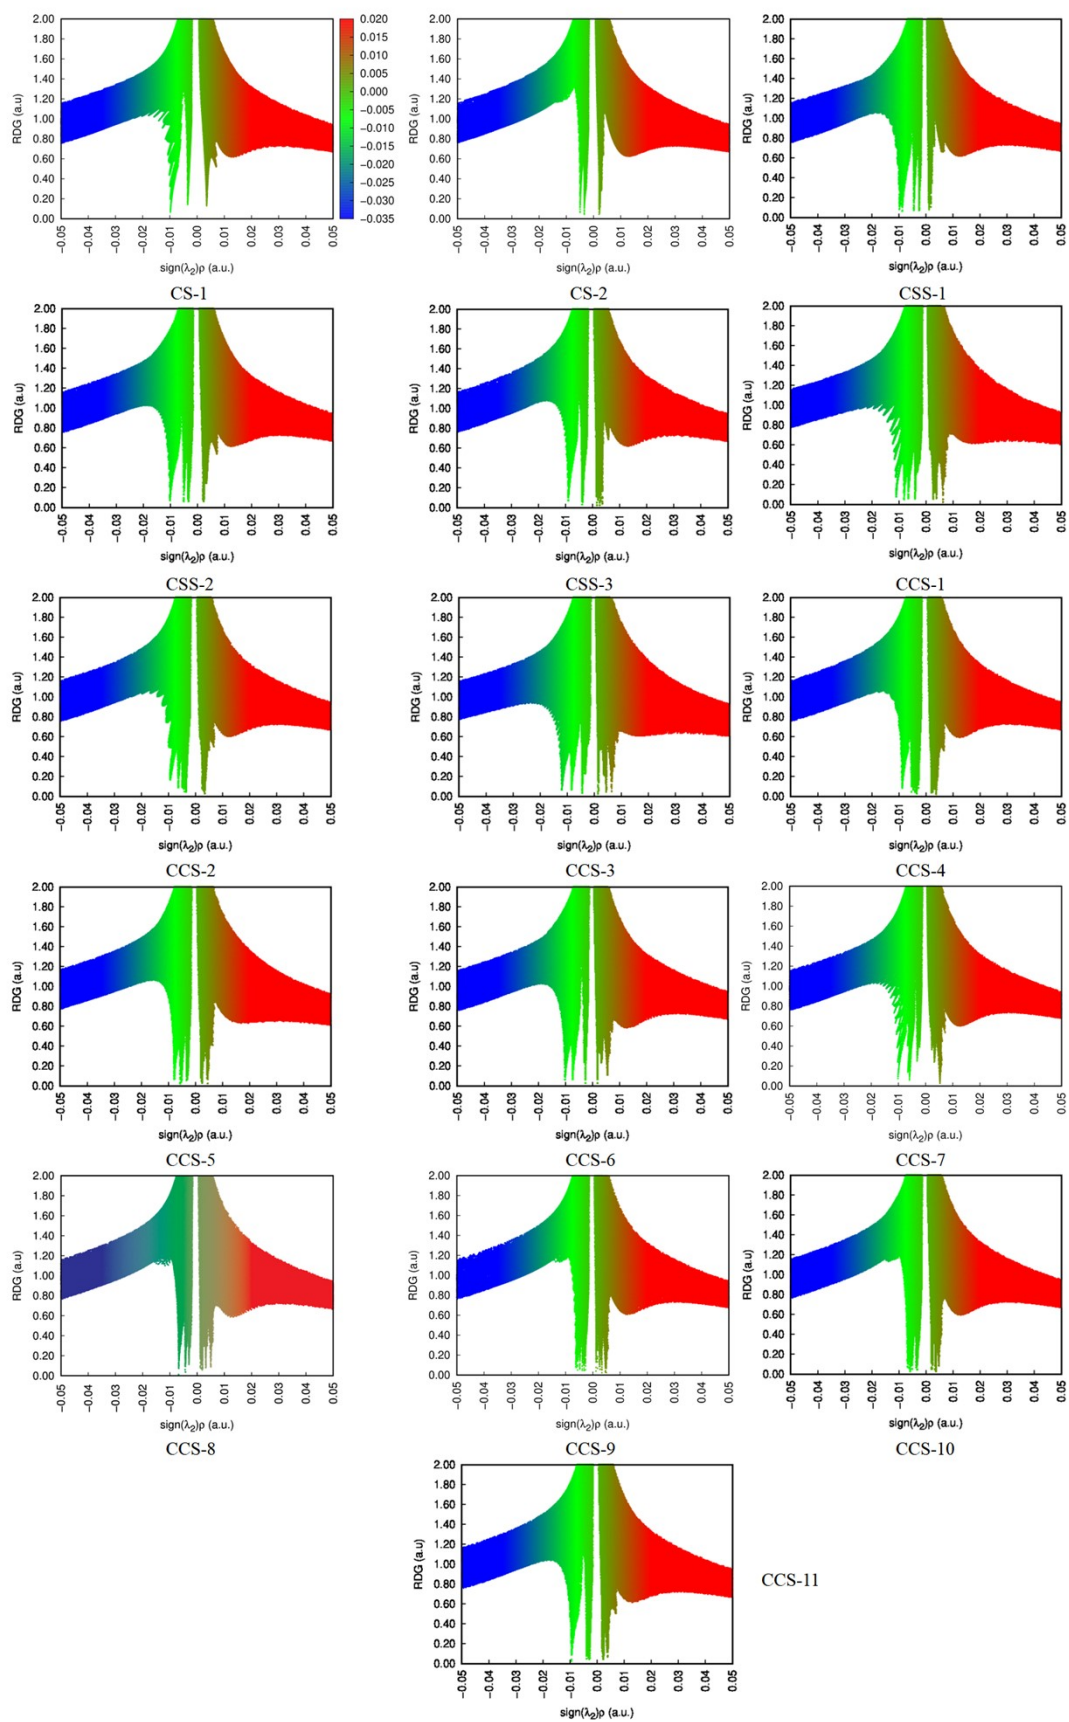

**Figure S7:** Reduced density gradient plot for different conformers of  $(\text{CHCl}_3)_X\text{-(H}_2\text{S)}_Y$  ( $X, Y=1, 2$ )

**Table S1:**  $\nu_{C-H}$ ,  $\nu_{S-H}^{asym}$  and the spectral shifts in them for CS-2 conformer, calculated at different level of theories

| aug-cc-pV(Q+d)Z |                    |                       |                   |                    |        |                          |
|-----------------|--------------------|-----------------------|-------------------|--------------------|--------|--------------------------|
| Method          | $\nu_{C-H}^{mono}$ | $\nu_{C-H}^{complex}$ | $\Delta\nu_{C-H}$ | $\nu_{S-H}^{asym}$ |        | $\Delta\nu_{S-H}^{asym}$ |
| MP2             | 3193.0             | 3178.3                | <b>-14.7</b>      | 2798.6             | 2789.5 | <b>-9.1</b>              |

| aug-cc-pV(T+d)Z |                    |                       |                   |                    |         |                          |
|-----------------|--------------------|-----------------------|-------------------|--------------------|---------|--------------------------|
| Methods         | $\nu_{C-H}^{mono}$ | $\nu_{C-H}^{complex}$ | $\Delta\nu_{C-H}$ | $\nu_{S-H}^{asym}$ |         | $\Delta\nu_{S-H}^{asym}$ |
| B3LYP           | 3177.46            | 3177.77               | <b>0.31</b>       | 2695.98            | 2696.67 | <b>0.69</b>              |
| B3PW91          | 3174.23            | 3174.51               | <b>0.28</b>       | 2719.48            | 2719.77 | <b>0.29</b>              |
| B97D3           | 3123.38            | 3124.61               | <b>1.23</b>       | 2664.34            | 2666.84 | <b>2.5</b>               |
| BLYP            | 3103.43            | 3103.72               | <b>0.29</b>       | 2609.38            | 2611.18 | <b>1.8</b>               |
| HSEh1PBE        | 3183.52            | 3183.73               | <b>0.21</b>       | 2732.78            | 2731.03 | <b>-1.75</b>             |
| M062X           | 3201.63            | 3202.59               | <b>0.96</b>       | 2749.86            | 2745.01 | <b>-4.85</b>             |
| Mpw1pw91        | 3190.97            | 3191.35               | <b>0.38</b>       | 2739.82            | 2740.09 | <b>0.27</b>              |
| PBEPBE          | 3094.56            | 3095.11               | <b>0.55</b>       | 2643.11            | 2638.18 | <b>-4.93</b>             |
| TPSSh           | 3173.73            | 3174.2                | <b>0.47</b>       | 2711.4             | 2711.73 | <b>0.33</b>              |

| Def2tzvpp |                    |                       |                   |                    |         |                          |
|-----------|--------------------|-----------------------|-------------------|--------------------|---------|--------------------------|
| Methods   | $\nu_{C-H}^{mono}$ | $\nu_{C-H}^{complex}$ | $\Delta\nu_{C-H}$ | $\nu_{S-H}^{asym}$ |         | $\Delta\nu_{S-H}^{asym}$ |
| B3LYP     | 3173.46            | 3173.56               | <b>0.1</b>        | 2700.13            | 2700.29 | <b>0.16</b>              |
| B3PW91    | 3170.46            | 3170.8                | <b>0.34</b>       | 2723.51            | 2724.39 | <b>0.88</b>              |
| B97D3     | 3115.92            | 3116.65               | <b>0.73</b>       | 2667.19            | 2667.99 | <b>0.8</b>               |
| BLYP      | 3098.11            | 3098.17               | <b>0.06</b>       | 2613.34            | 2615.4  | <b>2.06</b>              |
| HSEh1PBE  | 3179.35            | 3179.35               | <b>0</b>          | 2737.58            | 2734.85 | <b>-2.73</b>             |
| M062X     | 3199.56            | 3196.51               | <b>-3.05</b>      | 2755.28            | 2749.07 | <b>-6.21</b>             |
| Mpw1pw91  | 3187.12            | 3187.18               | <b>0.06</b>       | 2743.75            | 2743.6  | <b>-0.15</b>             |
| PBEPBE    | 3090.07            | 3090.27               | <b>0.2</b>        | 2647               | 2642.41 | <b>-4.59</b>             |
| TPSSh     | 3169.49            | 3169.52               | <b>0.03</b>       | 2714.96            | 2714.87 | <b>-0.09</b>             |



**Table S2:** NBO analysis showing the charge transfer interaction energy (in kcal mol<sup>-1</sup>) between different orbitals in the conformers of (CHCl<sub>3</sub>)<sub>X</sub>-(H<sub>2</sub>S)<sub>Y</sub> (X,Y=1,2), calculated at ωB97X-D/aug-cc-pV(D+d)Z level of theory

|               | n(S)→σ*(C-H) | n(Cl)→σ*(S-H) | n(S)→σ*(S-H) | n(Cl)→σ*(C-H)        |
|---------------|--------------|---------------|--------------|----------------------|
| <b>CS-1</b>   | 4.49         | -             | -            | -                    |
| <b>CS-2</b>   | -            | 1.66          | -            | -                    |
| <b>CSS-1</b>  | 6.93         | 1.22          | 5.28         | -                    |
| <b>CSS-2</b>  | 5.35         | 0.12<br>1.81  | -            | -                    |
| <b>CSS-3</b>  | -            | 0.73<br>1.50  | 5.39         | -                    |
| <b>CCS-1</b>  | 5.95<br>0.40 | 2.92          | -            | 5.08                 |
| <b>CCS-2</b>  | 4.32         | 0.12          | -            | 1.52<br>2.34<br>0.62 |
| <b>CCS-3</b>  | 6.00         | 0.14          | -            | 6.21<br>0.52         |
| <b>CCS-4</b>  | 4.38         | 0.40<br>0.23  | -            | 2.64                 |
| <b>CCS-5</b>  | 2.25         | 0.09          | -            | 1.19<br>2.55         |
| <b>CCS-6</b>  | 5.70         | 0.12          | -            | 4.57                 |
| <b>CCS-7</b>  | 5.2          | 0.12          | -            | 3.88                 |
| <b>CCS-8</b>  | -            | 1.52<br>1.34  | -            | 3.90                 |
| <b>CCS-9</b>  | -            | 0.58<br>2.09  | -            | 3.72                 |
| <b>CCS-10</b> | -            | 1.82          | -            | 1.14<br>3.33         |
| <b>CCS-11</b> | 4.11         | -             | -            | 0.44                 |

**Table S3:**  $\rho_c$  and  $\nabla^2\rho_c$  (in a.u.) at bond critical points for conformers  $(\text{CHCl}_3)_X\text{-(H}_2\text{S)}_Y$  ( $X, Y=1,2$ ), calculated at  $\omega\text{B97X-D/aug-cc-pV(D+d)Z}$  level of theory

| Conformer | $\rho_{CP}$ | $\nabla^2\rho_{CP}$ | $\rho_{CP}$ | $\nabla^2\rho_{CP}$ | $\rho_{CP}$ | $\nabla^2\rho_{CP}$ |
|-----------|-------------|---------------------|-------------|---------------------|-------------|---------------------|
| CS-1      | C-H...S     |                     |             |                     |             |                     |
|           | 0.0098      | 0.0311              |             |                     |             |                     |
| CS-2      | S-H...Cl    |                     | S-H...Cl    |                     | S-H...Cl    |                     |
|           | 0.0034      | 0.0120              | 0.0034      | 0.0119              | 0.0050      | 0.0172              |
| CSS-1     | S-H...Cl    |                     | S-H...Cl    |                     | S-H...S     |                     |
|           | 0.0045      | 0.0160              | 0.0025      | 0.0093              | 0.0088      | 0.0277              |
|           | C-H...S     |                     |             |                     |             |                     |
|           | 0.0098      | 0.0322              |             |                     |             |                     |
| CSS-2     | S-H...Cl    |                     | S-H...Cl    |                     | S-H...Cl    |                     |
|           | 0.0051      | 0.0174              | 0.0033      | 0.0115              | 0.0035      | 0.0123              |
|           | C-H...S     |                     |             |                     |             |                     |
|           | 0.0102      | 0.0330              |             |                     |             |                     |
| CSS-3     | S-H...Cl    |                     | S-H...Cl    |                     | S-H...Cl    |                     |
|           | 0.0039      | 0.0139              | 0.0039      | 0.0138              | 0.0039      | 0.0140              |
|           | S-H...Cl    |                     | S-H...Cl    |                     | S-H...Cl    |                     |
|           | 0.0038      | 0.0136              | 0.0036      | 0.0127              | 0.0036      | 0.0127              |
|           | S-H...S     |                     |             |                     |             |                     |
|           | 0.0090      | 0.0278              |             |                     |             |                     |
| CCS-1     | C-H...Cl    |                     | C-H...Cl    |                     | C-H...S     |                     |
|           | 0.0081      | 0.0245              | 0.0081      | 0.0245              | 0.0041      | 0.0125              |
|           | S-H...Cl    |                     | C-H...S     |                     | S-H...Cl    |                     |
|           | 0.0066      | 0.0189              | 0.0110      | 0.0265              | 0.0066      | 0.0188              |
| CCS-2     | C-H...Cl    |                     | C-H...Cl    |                     | C-H...Cl    |                     |
|           | 0.0064      | 0.0232              | 0.0044      | 0.0157              | 0.0049      | 0.0172              |
|           | C-H...Cl    |                     | C-H...S     |                     | Cl...Cl     |                     |
|           | 0.0042      | 0.0152              | 0.0094      | 0.0297              | 0.0035      | 0.0115              |
|           | S...Cl      |                     |             |                     |             |                     |
|           | 0.0041      | 0.0112              |             |                     |             |                     |
| CCS-3     | C-H...Cl    |                     | C-H...Cl    |                     | C-H...S     |                     |
|           | 0.0084      | 0.0253              | 0.0084      | 0.0253              | 0.0120      | 0.0280              |
|           | S-H...Cl    |                     | S-H...Cl    |                     |             |                     |
|           | 0.0045      | 0.0138              | 0.0044      | 0.0137              |             |                     |
| CCS-4     | C-H...Cl    |                     | C-H...Cl    |                     | C-H...Cl    |                     |
|           | 0.0047      | 0.0169              | 0.0054      | 0.0187              | 0.0034      | 0.0123              |
|           | C-H...S     |                     | Cl...Cl     |                     | Cl...Cl     |                     |
|           | 0.0089      | 0.0277              | 0.0028      | 0.0088              | 0.0034      | 0.0113              |
|           | Cl...Cl     |                     | S...Cl      |                     |             |                     |
|           | 0.0038      | 0.0123              |             |                     |             |                     |
| CCS-5     | C-H...Cl    |                     | S-H...Cl    |                     | S-H...Cl    |                     |
|           | 0.0079      | 0.0245              | 0.0051      | 0.0154              | 0.0052      | 0.0157              |
|           | C-H...S     |                     | Cl...Cl     |                     | Cl...Cl     |                     |
|           | 0.0079      | 0.0203              | 0.0033      | 0.0090              | 0.0031      | 0.0084              |
|           | Cl...Cl     |                     | S...Cl      |                     |             |                     |
|           | 0.0028      | 0.0077              | 0.0057      | 0.0152              |             |                     |
| CCS-6     | C-H...Cl    |                     | C-H...Cl    |                     | C-H...S     |                     |
|           | 0.0074      | 0.0253              | 0.0074      | 0.0254              | 0.0102      | 0.0330              |
|           | Cl...Cl     |                     |             |                     |             |                     |
|           | 0.0026      | 0.0081              |             |                     |             |                     |
| CCS-7     | C-H...Cl    |                     | C-H...Cl    |                     | C-H...Cl    |                     |

|        |          |        |          |        |          |        |
|--------|----------|--------|----------|--------|----------|--------|
|        | 0.0059   | 0.0198 | 0.0059   | 0.0197 | 0.0065   | 0.0214 |
|        | C-H...S  |        |          |        |          |        |
|        | 0.0101   | 0.0329 |          |        |          |        |
| CCS-8  | C-H...Cl |        | C-H...Cl |        | S-H...Cl |        |
|        | 0.0068   | 0.0235 | 0.0068   | 0.0240 | 0.0044   | 0.0152 |
|        | S-H...Cl |        | S-H...Cl |        | S-H...Cl |        |
|        | 0.0043   | 0.0151 | 0.0044   | 0.0154 | 0.0043   | 0.0154 |
|        | Cl...Cl  |        |          |        |          |        |
|        | 0.0030   | 0.0090 |          |        |          |        |
| CCS-9  | C-H...Cl |        | C-H...Cl |        | C-H...Cl |        |
|        | 0.0063   | 0.0206 | 0.0056   | 0.0188 | 0.0048   | 0.0161 |
|        | S-H...Cl |        | Cl...Cl  |        | S...Cl   |        |
|        | 0.0061   | 0.0206 | 0.0034   | 0.0104 | 0.0039   | 0.0111 |
|        | S...Cl   |        |          |        |          |        |
|        | 0.0032   | 0.0111 |          |        |          |        |
| CCS-10 | C-H...Cl |        | C-H...Cl |        | C-H...Cl |        |
|        | 0.0058   | 0.0211 | 0.0062   | 0.0216 | 0.0069   | 0.0238 |
|        | S-H...Cl |        | S-H...Cl |        | S-H...Cl |        |
| 0.0034 | 0.0122   | 0.0051 | 0.0177   | 0.0033 | 0.0109   |        |
| CCS-11 | C-H...S  |        | Cl...Cl  |        | Cl...Cl  |        |
|        | 0.0095   | 0.0301 | 0.0029   | 0.0090 | 0.0032   | 0.0100 |
|        | Cl...Cl  |        | Cl...Cl  |        | Cl...Cl  |        |
|        | 0.0028   | 0.0083 | 0.0036   | 0.0109 | 0.0031   | 0.0094 |
|        | Cl...Cl  |        |          |        |          |        |
|        | 0.0032   | 0.0100 |          |        |          |        |

**Table S4:** Cartesian coordinates and normal mode frequencies of all the optimized geometries of conformers calculated at  $\omega$ B97X-D/aug-cc-pV(D+d)Z level of theory

| Conformer               |    | Coordinates (Å) |             |             | Frequencies (cm <sup>-1</sup> ) |           |           |
|-------------------------|----|-----------------|-------------|-------------|---------------------------------|-----------|-----------|
| <b>CHCl<sub>3</sub></b> | C  | -0.00003800     | 0.00001400  | 0.45807100  |                                 |           |           |
|                         | H  | -0.00001600     | 0.00001900  | 1.54950800  | 265.7745                        | 266.0740  | 374.2014  |
|                         | Cl | 1.42391200      | -0.90074400 | -0.08432500 | 682.7769                        | 784.1662  | 785.6653  |
|                         | Cl | 0.06812800      | 1.68349100  | -0.08427400 | 1227.1065                       | 1227.3114 | 3183.1590 |
|                         | Cl | -1.49202600     | -0.78275300 | -0.08422000 |                                 |           |           |
| <b>H<sub>2</sub>S</b>   | H  | 0.00000000      | 0.97424600  | -0.82756600 |                                 |           |           |
|                         | H  | 0.00000000      | -0.97424600 | -0.82756600 | 1197.9721                       | 2745.6311 | 2761.5041 |
|                         | S  | 0.00000000      | 0.00000000  | 0.10344600  |                                 |           |           |
| <b>CS-1</b>             | H  | -2.79424900     | -0.99739700 | -0.30896400 |                                 |           |           |
|                         | H  | -2.77862400     | 0.94999500  | -0.36213400 | 30.3131                         | 35.0620   | 57.6573   |
|                         | S  | -3.04686700     | 0.00276300  | 0.55931000  | 74.9307                         | 178.7199  | 196.4571  |
|                         | C  | 0.57511500      | -0.00006500 | 0.14366800  | 266.1704                        | 266.8238  | 375.0038  |
|                         | H  | -0.29722200     | -0.00025700 | 0.80229900  | 679.7311                        | 778.5123  | 789.4248  |
|                         | Cl | 0.48985000      | 1.46311400  | -0.85372700 | 1199.6232                       | 1229.6780 | 1251.4815 |
|                         | Cl | 0.48132500      | -1.45433900 | -0.86601100 | 2733.3918                       | 2751.1742 | 3161.9590 |
|                         | Cl | 2.03878200      | -0.00854900 | 1.13490500  |                                 |           |           |
| <b>CS-2</b>             | C  | 1.35386000      | -0.07019700 | -0.00057400 |                                 |           |           |
|                         | H  | 2.44093800      | -0.16402500 | -0.00136000 | 35.8697                         | 37.1866   | 58.8168   |
|                         | Cl | 0.73831800      | -0.86236600 | 1.45700900  | 107.6981                        | 118.8350  | 141.9701  |
|                         | Cl | 0.73674200      | -0.85596900 | -1.46094300 | 265.6543                        | 266.6288  | 375.7966  |
|                         | Cl | 0.96156800      | 1.65827200  | 0.00343700  | 682.9571                        | 781.3851  | 786.5011  |
|                         | H  | -1.93051300     | 0.93593700  | 0.00211700  | 1203.6170                       | 1226.2413 | 1226.5305 |
|                         | H  | -2.20148400     | -0.98832700 | -0.00066000 | 2728.3579                       | 2745.2211 | 3187.5559 |
|                         | S  | -2.99092400     | 0.10366700  | 0.00073800  |                                 |           |           |
| <b>CSS-1</b>            | H  | -1.69717600     | 2.71651200  | 1.20812300  |                                 |           |           |
|                         | H  | -2.34672800     | 1.38002200  | -0.05168400 | 16.3888                         | 22.1031   | 42.2872   |
|                         | S  | -1.62650600     | 2.51992500  | -0.11863200 | 58.9335                         | 68.5735   | 89.5123   |
|                         | C  | 1.18787500      | 0.00747400  | -0.00872900 | 106.1124                        | 140.9890  | 188.2226  |
|                         | H  | 0.51802900      | 0.86256600  | -0.04533000 | 192.7888                        | 225.4641  | 266.6125  |
|                         | Cl | 0.86686000      | -0.99737400 | -1.44465000 | 266.9237                        | 338.0380  | 375.5274  |
|                         | Cl | 0.82978900      | -0.89550800 | 1.48848200  | 677.6285                        | 774.0933  | 787.5723  |
|                         | Cl | 2.86048900      | 0.60076800  | -0.00585700 | 1198.5854                       | 1206.3316 | 1253.2506 |
|                         | S  | -3.15553300     | -1.26994000 | 0.03315700  | 1260.9615                       | 2654.9874 | 2722.8899 |
|                         | H  | -2.49777800     | -1.51872400 | -1.11156300 | 2742.8968                       | 2746.2330 | 3133.2263 |
|                         | H  | -2.06234000     | -1.51902600 | 0.77485100  |                                 |           |           |
| <b>CSS-2</b>            | H  | 3.53291700      | -0.93960200 | -1.07775800 |                                 |           |           |
|                         | H  | 3.44403900      | -1.25395400 | 0.84331100  | 20.0484                         | 20.6696   | 40.7511   |
|                         | S  | 3.94457400      | -0.29831000 | 0.03446700  | 41.7398                         | 51.1497   | 55.4042   |
|                         | C  | 0.38078400      | 0.46780800  | 0.04574500  | 78.9295                         | 119.5911  | 129.6186  |
|                         | H  | 1.43149100      | 0.76094500  | 0.11684600  | 163.5741                        | 170.7204  | 182.7814  |
|                         | Cl | 0.06663900      | -0.71642000 | 1.32552300  | 265.8926                        | 266.5753  | 376.3476  |
|                         | Cl | 0.14195100      | -0.25974800 | -1.55555500 | 679.7981                        | 775.7684  | 788.2971  |
|                         | Cl | -0.63063400     | 1.90406200  | 0.24534700  | 1199.5920                       | 1201.2731 | 1234.6412 |
|                         | S  | -3.79857700     | -0.72345800 | -0.06424900 | 1252.6046                       | 2731.6772 | 2731.8010 |
|                         | H  | -3.15006000     | -0.05660200 | 0.91068500  | 2747.8015                       | 2748.2338 | 3161.7428 |
|                         | H  | -2.70429300     | -0.74355700 | -0.85138600 |                                 |           |           |
| <b>CSS-3</b>            | C  | -1.57725300     | -0.87090800 | 0.00174700  | 23.8326                         | 36.3462   | 36.9211   |
|                         | H  | -2.27453700     | -1.71028700 | 0.00346400  | 42.6782                         | 63.9018   | 77.6409   |
|                         | Cl | -0.57675800     | -0.99007900 | 1.45751800  | 97.2404                         | 109.5432  | 115.2699  |

|  |    |             |             |             |           |           |           |
|--|----|-------------|-------------|-------------|-----------|-----------|-----------|
|  | Cl | -2.52606200 | 0.62434600  | 0.00429700  | 186.7642  | 196.6134  | 266.6863  |
|  | Cl | -0.58517500 | -0.99000900 | -1.46026000 | 267.2392  | 303.1761  | 375.4440  |
|  | H  | 2.18255600  | -1.63002000 | -0.01698800 | 682.9925  | 784.2406  | 784.5103  |
|  | H  | 2.57274700  | 0.28207400  | 0.00880600  | 1200.5304 | 1204.5501 | 1226.3979 |
|  | S  | 3.29069800  | -0.86403300 | 0.00091400  | 1227.4794 | 2687.9816 | 2739.1165 |
|  | S  | 1.03044900  | 2.56878700  | -0.00290400 | 2746.4236 | 2755.4979 | 3185.0762 |
|  | H  | 0.26366200  | 2.04178900  | 0.97237400  |           |           |           |
|  | H  | 0.27664200  | 2.01344100  | -0.97271400 |           |           |           |
|  | H  | 0.68581200  | 2.52924600  | -0.97375900 |           |           |           |
|  | H  | 0.68290200  | 2.52786900  | 0.97529400  | 16.6025   | 24.7106   | 27.1585   |
|  | S  | -0.12238500 | 2.99593400  | -0.00008700 | 36.4522   | 45.2668   | 56.9162   |
|  | C  | -2.26923500 | 0.00127600  | -0.00075500 | 62.7627   | 68.6885   | 82.4643   |
|  | H  | -2.08820700 | 1.07877700  | -0.00012200 | 128.9396  | 227.2849  | 240.5957  |
|  | Cl | -1.50672400 | -0.66427600 | 1.45677200  | 265.4802  | 267.0063  | 267.9410  |
|  | Cl | -1.51064500 | -0.66156300 | -1.46164400 | 270.3606  | 374.9835  | 377.5775  |
|  | Cl | -4.00991900 | -0.29320300 | 0.00129800  | 677.4124  | 685.4223  | 770.3410  |
|  | C  | 1.88863300  | -0.37458600 | -0.00092100 | 784.3033  | 790.3636  | 792.9777  |
|  | H  | 0.81734700  | -0.16336900 | -0.00600900 | 1202.4257 | 1229.4841 | 1230.3255 |
|  | Cl | 2.59206500  | 0.35670200  | -1.45571400 | 1250.2618 | 1251.2053 | 2723.8355 |
|  | Cl | 2.10146400  | -2.12596800 | -0.00428900 | 2738.6935 | 3167.6301 | 3192.3087 |
|  | Cl | 2.57751900  | 0.34903800  | 1.46452100  |           |           |           |
|  | C  | 1.77266700  | -0.57978600 | 0.06446700  |           |           |           |
|  | H  | 1.05708400  | 0.22249400  | 0.26415600  | 9.7504    | 21.3282   | 28.6595   |
|  | Cl | 2.27105300  | -0.45278300 | -1.63040700 | 36.6935   | 39.3790   | 41.5274   |
|  | Cl | 3.15032100  | -0.35847200 | 1.14826900  | 55.0221   | 57.1375   | 65.2846   |
|  | Cl | 0.97716100  | -2.13865600 | 0.36909200  | 79.8303   | 135.0661  | 212.7783  |
|  | C  | -2.23949000 | -0.43464100 | 0.07572400  | 265.9609  | 266.8240  | 268.4096  |
|  | H  | -1.85026500 | -1.44640000 | 0.20231500  | 268.6395  | 374.5136  | 377.9311  |
|  | Cl | -4.00339200 | -0.51497300 | 0.01593400  | 680.3928  | 685.0960  | 772.7339  |
|  | Cl | -1.69078200 | 0.52922600  | 1.45692400  | 779.7115  | 788.3999  | 791.0686  |
|  | Cl | -1.57920300 | 0.20293800  | -1.44164300 | 1200.2430 | 1226.7781 | 1230.7721 |
|  | S  | 1.04479800  | 3.00671200  | 0.10428500  | 1235.9589 | 1243.4640 | 2735.3294 |
|  | H  | -0.08372100 | 2.81955100  | -0.60883400 | 2752.5480 | 3178.3852 | 3188.4584 |
|  | H  | 1.83338300  | 2.83976300  | -0.97624600 |           |           |           |
|  | H  | 0.70238600  | 2.71574100  | 0.97992400  |           |           |           |
|  | H  | 0.69917900  | 2.72331400  | -0.96455200 | 12.6703   | 17.4920   | 23.2827   |
|  | S  | 1.52260200  | 3.16415200  | 0.00806600  | 31.1362   | 39.7985   | 48.7104   |
|  | C  | 2.23922400  | -0.39600800 | -0.00388900 | 57.3379   | 61.0718   | 85.2140   |
|  | H  | 2.52615300  | 0.65927800  | 0.00107400  | 168.5860  | 219.0019  | 236.7661  |
|  | Cl | 1.27627000  | -0.67600000 | -1.46933300 | 265.7244  | 266.4695  | 268.3805  |
|  | Cl | 1.26344900  | -0.68670400 | 1.45065100  | 270.5586  | 375.9694  | 377.1648  |
|  | Cl | 3.69433800  | -1.39405700 | -0.00136000 | 678.7158  | 685.1480  | 772.1740  |
|  | C  | -2.11294000 | -0.28151500 | -0.00473200 | 778.9972  | 793.7888  | 794.2242  |
|  | H  | -1.07778900 | -0.62609500 | -0.02498300 | 1201.0259 | 1231.2945 | 1235.8437 |
|  | Cl | -2.08764200 | 1.49367500  | 0.00175800  | 1240.2484 | 1256.6718 | 2735.2051 |
|  | Cl | -2.86918600 | -0.90462700 | 1.46684500  | 2750.3425 | 3159.2966 | 3199.7508 |
|  | Cl | -2.92247900 | -0.89308400 | -1.45260700 |           |           |           |
|  | C  | 2.60823600  | 0.51360800  | 0.03465600  | 19.5251   | 26.3597   | 35.3842   |
|  | H  | 3.40834900  | 1.24652700  | 0.15015400  | 37.0949   | 38.5772   | 45.3138   |
|  | Cl | 1.58286900  | 0.60205200  | 1.47935400  | 50.8239   | 52.1639   | 63.1232   |
|  | Cl | 1.69007300  | 0.93933300  | -1.41823800 | 82.4096   | 161.0761  | 191.8472  |
|  | Cl | 3.34762600  | -1.08326900 | -0.12029200 | 265.9999  | 266.2087  | 267.4317  |
|  | C  | -1.53719500 | -0.73820200 | -0.06611900 | 268.2378  | 375.6873  | 376.3150  |
|  | H  | -0.93554500 | 0.14480600  | -0.29615200 | 681.0804  | 683.3343  | 772.3341  |

|              |    |             |             |             |           |           |           |
|--------------|----|-------------|-------------|-------------|-----------|-----------|-----------|
|              | Cl | -0.53788000 | -2.17879300 | -0.28868900 | 783.4961  | 787.6966  | 790.9093  |
|              | Cl | -2.07734100 | -0.59518600 | 1.61880100  | 1197.2813 | 1225.8274 | 1228.9011 |
|              | Cl | -2.92291700 | -0.74648100 | -1.16865800 | 1233.6809 | 1244.6699 | 2732.7540 |
|              | S  | -1.49346600 | 2.91967300  | -0.17424700 | 2749.8962 | 3174.2749 | 3185.0590 |
|              | H  | -2.62972800 | 2.51118300  | 0.42505200  |           |           |           |
|              | H  | -0.77518800 | 2.79014700  | 0.95895000  |           |           |           |
|              | H  | 3.20079800  | 2.05284000  | -0.73721300 |           |           |           |
|              | H  | 2.33822400  | 2.22457200  | 1.00083100  | 18.0602   | 23.0500   | 31.2146   |
|              | S  | 2.22868200  | 2.82043600  | -0.20409400 | 39.9740   | 46.9541   | 47.7596   |
|              | C  | 1.48831800  | -0.81625800 | -0.10138300 | 54.2189   | 62.6684   | 76.8463   |
|              | H  | 1.09910600  | 0.13471000  | -0.47265100 | 81.7723   | 198.6171  | 213.7988  |
|              | Cl | 1.56960400  | -0.70645700 | 1.66600400  | 266.6526  | 266.6895  | 267.6457  |
| <b>CCS-5</b> | Cl | 3.10718600  | -1.04662800 | -0.79084100 | 268.7103  | 376.1773  | 376.7807  |
|              | Cl | 0.39415800  | -2.10561800 | -0.60835700 | 681.2435  | 683.0954  | 774.8042  |
|              | C  | -2.71561300 | 0.65005100  | 0.07316600  | 781.4750  | 788.2160  | 792.1746  |
|              | H  | -3.53351500 | 1.34696600  | 0.26319400  | 1199.1409 | 1222.6756 | 1228.2452 |
|              | Cl | -2.50041100 | -0.34637300 | 1.51785800  | 1229.7064 | 1242.8274 | 2729.8485 |
|              | Cl | -1.26008700 | 1.60782300  | -0.25924000 | 2745.9320 | 3178.7163 | 3185.6521 |
|              | Cl | -3.15749400 | -0.33738300 | -1.32656300 |           |           |           |
|              | C  | 1.69257400  | 0.43194300  | 0.25800000  |           |           |           |
|              | H  | 2.68439200  | 0.41299400  | 0.71744200  | 12.4279   | 14.9792   | 18.0846   |
|              | Cl | 1.87141100  | 1.05338500  | -1.38767400 | 23.1837   | 27.1179   | 46.0620   |
|              | Cl | 1.08529400  | -1.23664700 | 0.24140600  | 53.8450   | 64.2155   | 68.8337   |
|              | Cl | 0.63818500  | 1.47702300  | 1.22426500  | 82.2762   | 178.9857  | 223.5644  |
|              | C  | -2.46306900 | -0.20941800 | 0.07475800  | 265.8553  | 265.9142  | 266.3393  |
| <b>CCS-6</b> | H  | -1.51183200 | -0.22405100 | 0.60882200  | 268.0144  | 375.7675  | 376.7626  |
|              | Cl | -3.57885000 | 0.82512800  | 0.97979100  | 680.1707  | 682.6982  | 775.5717  |
|              | Cl | -2.16233500 | 0.44091100  | -1.54255700 | 783.5111  | 787.0959  | 790.0354  |
|              | Cl | -3.06340500 | -1.87329200 | -0.01003500 | 1200.5102 | 1227.8432 | 1236.9213 |
|              | S  | 5.15772300  | -0.68477400 | 0.36206900  | 1238.7014 | 1255.3338 | 2731.3881 |
|              | H  | 4.52145500  | -1.86625300 | 0.23183800  | 2748.1844 | 3162.5778 | 3194.4276 |
|              | H  | 4.97029400  | -0.37211600 | -0.93608000 |           |           |           |
|              | C  | 1.62542700  | 0.61785100  | -0.00042700 |           |           |           |
|              | H  | 2.70076900  | 0.81507900  | 0.00271600  | 8.3522    | 13.2984   | 13.7093   |
|              | Cl | 0.75468800  | 2.15880200  | -0.01446300 | 21.0259   | 22.2024   | 38.2309   |
|              | Cl | 1.25428700  | -0.32811800 | -1.45367700 | 40.8592   | 47.6691   | 52.1594   |
|              | Cl | 1.24198900  | -0.30880600 | 1.46182300  | 76.2302   | 181.5468  | 193.1499  |
|              | C  | -2.28861700 | -0.19705800 | -0.00186700 | 265.9237  | 266.1535  | 266.7037  |
| <b>CCS-7</b> | H  | -1.24619000 | 0.12299500  | -0.01020400 | 267.1458  | 376.8944  | 377.4752  |
|              | Cl | -3.06117500 | 0.44429700  | -1.45910300 | 679.8897  | 690.2741  | 773.6861  |
|              | Cl | -2.31310500 | -1.96668500 | 0.00573900  | 778.2866  | 789.1816  | 790.0629  |
|              | Cl | -3.04188700 | 0.45661800  | 1.45987600  | 1199.3966 | 1216.7887 | 1223.0521 |
|              | S  | 5.07812200  | -0.53884900 | 0.00881800  | 1231.2118 | 1252.2856 | 2729.7536 |
|              | H  | 4.58989000  | -1.24153500 | -1.03309000 | 2745.9360 | 3163.2314 | 3209.3232 |
|              | H  | 4.49318700  | -1.35353500 | 0.90992500  |           |           |           |
|              | H  | 0.41725300  | 3.02118000  | -0.18850300 | 19.0424   | 24.9488   | 33.3800   |
|              | H  | -1.39892200 | 2.37213500  | -0.42947700 | 36.3934   | 40.4631   | 42.2487   |
|              | S  | -0.81429300 | 3.56834900  | -0.21930000 | 52.7178   | 57.9173   | 67.4665   |
|              | C  | -2.29622400 | -1.12586800 | 0.46158300  | 111.7882  | 150.9225  | 183.6344  |
| <b>CCS-8</b> | H  | -3.19180400 | -1.51002600 | 0.95269600  | 265.9121  | 266.5785  | 267.8046  |
|              | Cl | -1.26076000 | -2.50989900 | 0.06719200  | 268.6756  | 375.6794  | 376.4429  |
|              | Cl | -1.48401600 | -0.02850000 | 1.58953500  | 681.2277  | 683.1521  | 775.9283  |
|              | Cl | -2.80046200 | -0.27181000 | -1.00311600 | 782.3675  | 787.7325  | 790.5658  |
|              | C  | 1.83069900  | -0.34884400 | 0.02911800  | 1198.8838 | 1224.1786 | 1228.0726 |

|               |    |             |             |             |           |           |           |
|---------------|----|-------------|-------------|-------------|-----------|-----------|-----------|
|               | H  | 1.04389000  | -0.90792100 | 0.53827100  | 1234.6207 | 1239.7086 | 2736.3930 |
|               | Cl | 1.15886500  | 0.26562500  | -1.48873400 | 2751.6397 | 3188.7821 | 3190.4527 |
|               | Cl | 3.18024800  | -1.45179600 | -0.27251400 |           |           |           |
|               | Cl | 2.32091500  | 0.98339900  | 1.08949600  |           |           |           |
|               | C  | 2.27624200  | -1.08394300 | 0.03478000  |           |           |           |
|               | H  | 3.33803600  | -1.33401100 | 0.06495000  | 15.9974   | 22.8493   | 24.0561   |
|               | Cl | 1.89109000  | -0.12441500 | 1.47012900  | 26.4662   | 34.1805   | 36.6746   |
|               | Cl | 1.97099000  | -0.15421400 | -1.44131000 | 40.8868   | 46.4586   | 58.9169   |
|               | Cl | 1.35583300  | -2.59913400 | 0.02360600  | 124.7563  | 151.5060  | 209.1413  |
|               | C  | -1.68990500 | -0.21474800 | 0.00375300  | 265.5731  | 266.9414  | 267.5549  |
| <b>CCS-9</b>  | H  | -0.65100500 | -0.54719100 | 0.04333900  | 268.6802  | 376.7855  | 377.6438  |
|               | Cl | -1.88508100 | 0.77635700  | -1.45417100 | 682.4513  | 688.9051  | 774.1432  |
|               | Cl | -2.71656800 | -1.65230100 | -0.06746300 | 778.3315  | 787.8320  | 793.5524  |
|               | Cl | -2.01593100 | 0.73503700  | 1.45904000  | 1215.2981 | 1219.1745 | 1220.6600 |
|               | S  | 1.07822100  | 3.37823400  | 0.01051500  | 1227.1517 | 1228.0107 | 2732.7615 |
|               | H  | 0.11105000  | 2.51666800  | -0.36386200 | 2749.5592 | 3189.8049 | 3193.7603 |
|               | H  | 0.22673000  | 4.42231600  | 0.02899900  |           |           |           |
|               | C  | 2.39173700  | 0.30489000  | -0.03179700 |           |           |           |
|               | H  | 1.36018900  | 0.64628000  | -0.13373800 | 12.2313   | 16.4399   | 17.9364   |
|               | Cl | 3.33637500  | 1.01435800  | -1.34593600 | 35.4979   | 41.2891   | 49.7666   |
|               | Cl | 2.99076300  | 0.82842900  | 1.54636000  | 52.6042   | 55.1954   | 67.2137   |
|               | Cl | 2.38472200  | -1.46836200 | -0.14715100 | 99.7712   | 131.7268  | 137.7245  |
|               | C  | -1.26898100 | -1.14588500 | -0.03022800 | 265.4746  | 266.3475  | 266.4879  |
| <b>CCS-10</b> | H  | -0.54858100 | -1.96420400 | -0.08160500 | 269.1267  | 374.7278  | 376.3341  |
|               | Cl | -2.89744600 | -1.83080700 | -0.00332100 | 679.5079  | 685.0738  | 773.5609  |
|               | Cl | -0.93748000 | -0.23429900 | 1.45529100  | 775.5301  | 788.7773  | 793.4133  |
|               | Cl | -1.03098800 | -0.12535800 | -1.45991800 | 1200.7774 | 1222.0052 | 1224.2065 |
|               | S  | -4.10811800 | 2.15563300  | -0.00710300 | 1231.6389 | 1235.9179 | 2732.8057 |
|               | H  | -3.10990200 | 1.66323300  | 0.75330600  | 2748.9550 | 3187.7954 | 3192.1424 |
|               | H  | -4.08943500 | 1.08321700  | -0.82268900 |           |           |           |
|               | C  | -1.65270400 | 0.62565400  | 0.19383500  |           |           |           |
|               | H  | -2.66832300 | 0.56663000  | 0.59292900  | 13.1850   | 16.7038   | 18.6380   |
|               | Cl | -0.81655000 | -0.87177500 | 0.63806800  | 26.6771   | 36.8933   | 49.3029   |
|               | Cl | -1.78503600 | 0.77365100  | -1.56931600 | 50.0319   | 55.5557   | 69.8228   |
|               | Cl | -0.84941400 | 2.03718200  | 0.89119600  | 84.5745   | 185.6414  | 247.2162  |
|               | C  | 3.14366800  | -0.19633700 | -0.20516000 | 265.3226  | 265.6077  | 266.4041  |
| <b>CCS-11</b> | H  | 4.19075000  | -0.02332000 | -0.45834300 | 267.0767  | 374.3662  | 374.7842  |
|               | Cl | 2.14885500  | 0.64675300  | -1.39963300 | 679.1163  | 682.0509  | 775.1114  |
|               | Cl | 2.86011600  | -1.94477900 | -0.25940700 | 780.4154  | 787.3493  | 789.0911  |
|               | Cl | 2.86790600  | 0.44172700  | 1.42240200  | 1200.4365 | 1227.9544 | 1228.3140 |
|               | S  | -4.83279200 | -1.15510500 | 0.32089700  | 1234.3922 | 1249.5321 | 2731.9946 |
|               | H  | -3.83819600 | -2.05008800 | 0.48934900  | 2747.9311 | 3169.2697 | 3188.3282 |
|               | H  | -4.54522700 | -0.99433100 | -0.98660300 |           |           |           |
